# Supplementary material for: Occurrence and spatial distribution of neutral perfluoroalkyl substances and cyclic volatile methylsiloxanes in the atmosphere of the Tibetan Plateau
Source: Copernicus journal article supplement (doi:10.5194/acp-18-8745-2018), 2018-06-21
Supplement: Supplementary file 1 [file acp-18-8745-2018-supplement.pdf]

Supplement of Atmos. Chem. Phys., 18, 8745–8755, 2018  
<https://doi.org/10.5194/acp-18-8745-2018-supplement>  
© Author(s) 2018. This work is distributed under  
the Creative Commons Attribution 4.0 License.

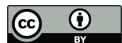

Atmospheric  
Chemistry  
and Physics  
Open Access  
EGU

*Supplement of*

## **Occurrence and spatial distribution of neutral perfluoroalkyl substances and cyclic volatile methylsiloxanes in the atmosphere of the Tibetan Plateau**

**Xiaoping Wang et al.**

*Correspondence to:* Xiaoping Wang (wangxp@itpcas.ac.cn)

The copyright of individual parts of the supplement might differ from the CC BY 4.0 License.

|                  |                                                                                                                        | Pages     |
|------------------|------------------------------------------------------------------------------------------------------------------------|-----------|
| <b>Figure S1</b> | <b>The passive air monitoring network comprising 16 sampling sites across the TP</b>                                   | <b>3</b>  |
| <b>Text S1</b>   | <b>Details related to the depuration compounds (DCs)</b>                                                               | <b>4</b>  |
| <b>Table S1</b>  | <b>Details about the recovery standard and internal standard</b>                                                       | <b>5</b>  |
| <b>Text S2</b>   | <b>Detailed analysis regarding GC program and MS detection ions</b>                                                    | <b>6</b>  |
| <b>Table SI2</b> | <b>Amount (pg/sample) of PFASs in field blanks</b>                                                                     | <b>7</b>  |
| <b>Table SI3</b> | <b>Amount (ng/sample) of cVMS in field blanks</b>                                                                      | <b>7</b>  |
| <b>Table S4</b>  | <b>Air concentrations of FTO, FTOHs, FBSA, FOSAs, FBSE and FOSEs (pg m<sup>-3</sup>).</b>                              | <b>8</b>  |
| <b>Table S5</b>  | <b>Relationships between Log KOA of individual VMSs and Log (K<sub>SIP-A</sub>)</b>                                    | <b>9</b>  |
| <b>Text S2</b>   | <b>Sampling rates (<i>Rs</i>) estimation using DCs</b>                                                                 | <b>10</b> |
| <b>Table S6</b>  | <b>Summary of the recoveries of DCs (%) and calculated <i>Rs</i> values for different sampling site</b>                | <b>11</b> |
| <b>Table S7</b>  | <b>Temperature-calibrated SIP-air partition coefficient (Log K<sub>SIP-A</sub>) for each sampling site</b>             | <b>12</b> |
| <b>Table S8</b>  | <b>The air volume sampled by the SIP disk V<sub>air</sub> (m<sup>3</sup>)</b>                                          | <b>13</b> |
| <b>Table S9</b>  | <b>Air concentrations of D3, D4, D5 and D6 (ng m<sup>-3</sup>).</b>                                                    | <b>14</b> |
| <b>Figure S2</b> | <b>Schematic of the air circulation pattern over the Tibetan Plateau</b>                                               | <b>15</b> |
| <b>Table S10</b> | <b>P-values (one-way ANOVA) for significant variation in levels of different class of chemicals in different sites</b> | <b>16</b> |
| <b>Table S11</b> | <b>Ratios of 4:2/8:2 FTOH, 8:2/10:2 FTOH, 10:2/6:2 FTOH in atmosphere of the TP</b>                                    | <b>17</b> |
| <b>Table S12</b> | <b>Correlation (<i>r</i>) of individual VMS compounds among all the samples</b>                                        | <b>18</b> |

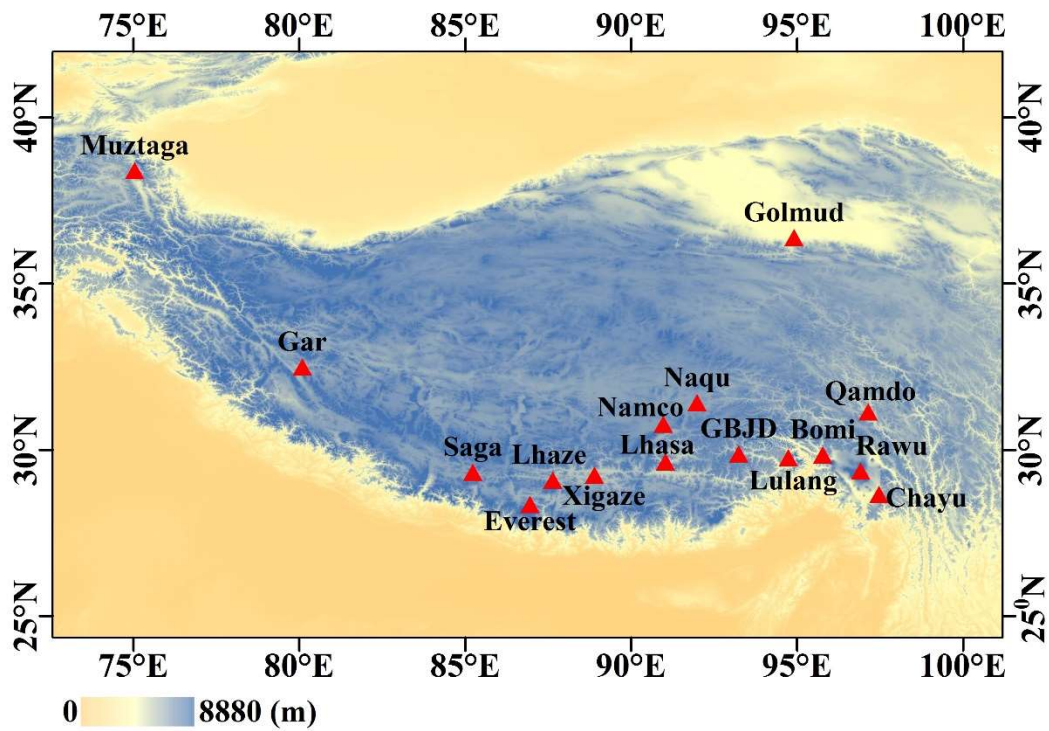

Figure S1. The passive air monitoring network comprising 16 sampling sites across the TP (Lhasa and Golmud are two booming cities, GBJD: Gongbujiangda)

---

### **Text SI 1 Details related to the depuration compounds (DCs)**

DCs are some semi-volatile chemicals which are added to determine site-specific sampling rates. Before sampling, the PUF-disks were spiked with four depuration compounds (DCs, PCB-30, -54, -104, -188). This was achieved by adding 50ul of the DC mixture (each DC is 400pg/ul) to approximately 15ml of hexane and then evenly applying to both sides of the PUF disk using a pipette. DCs will experience volatilization losses if exposed to air. The amount of losses will depend on their volatility, exposure time, temperature and wind speed. Because the uptake of SOCs is air-side controlled, the rate of uptake of chemical will be the same as the rate of loss. Then, by measuring the losses of DCs in PUF disks, the site-specific air sampling rates can be obtained.

| <b>Table S1 Details about the recovery standard and internal standard</b> |                                           |
|---------------------------------------------------------------------------|-------------------------------------------|
| Analyte                                                                   | Supplier (purity)                         |
| Recovery standard                                                         |                                           |
| 5:1 FTOH                                                                  | Matrix Scientific, Columbia, SC, USA, 99% |
| 7:1 FTOH                                                                  | Interchim, Montlucon Cedex, France, 97%   |
| 9:1 FTOH                                                                  | Interchim, Montlucon Cedex, France, 97%   |
| 11:1 FTOH                                                                 | Interchim, Montlucon Cedex, France, 97%   |
| [M+4]6:2 FTOH                                                             | Wellington Laboratories Inc, 98%          |
| [M+5]8:2 FTOH                                                             | DuPont                                    |
| [M+4]10:2 FTOH                                                            | Wellington Laboratories Inc, 98%          |
| [M+3]NMeFOSA                                                              | Wellington Laboratories Inc, 98%          |
| [M+5]NEtFOSA                                                              | Wellington Laboratories Inc, 98%          |
| [M+7]NMeFOSE                                                              | Wellington Laboratories Inc, 98%          |
| [M+9]NEtFOSE                                                              | Wellington Laboratories Inc, 98%          |
| Internal standard                                                         |                                           |
| 13:1 FTOH                                                                 | Interchim, Montlucon Cedex, France, 97%   |
| 13 C HCB                                                                  | Cambridge Isotope Laboratories, Inc, 99%  |

---

## Text S2 Detailed analysis regarding GC program and MS detection ions

Thermo DSQ GC–MS was used for analysis of neutral PFASs. The GC temperature program is as follows: 50 °C (held 1 min), ramped at 3 °C/min to 70 °C, ramped at 10 °C/min to 130 °C, then ramped at 20 °C/min to 225 °C (held 11.4 min), and finally cooled at 80 °C/min to 50 °C (total run time 32 min). A constant injection temperature of 200 °C was used, with a 2 mL splitless injection. Helium was employed as a carrier gas at a constant flow of 1 mL/min. The GC–MS transfer line temperature was set at 250 °C. Mass spectral analysis was performed in PCI-selected ion monitoring (PCI–SIM) mode, using methane as the reagent gas for quantification of target analytes (a seven point calibration curve (20, 50, 100, 200, 500, 1000 and 2000 pg injected) was used).

Quantification of cVMS was performed on a Trace GC Ultra (Thermo Electron Corp.) coupled to a MD800 MS detector (Fisons Instruments SpA) using electron ionization (EI). The GC temperature program incorporated an initial temperature of 40 °C with a hold time of 3 min, increased by 25 °C min<sup>-1</sup> to 190 °C, followed by a second temperature ramp of 40 °C min<sup>-1</sup> to 240 °C and held for 4 min. The MS was operated in selected ion monitoring (SIM) mode. The following ions were monitored in SIM mode: recording ions *m/z* 281/282 for D4, 355/267 for D5, 341/429 for D6, 284/285 for 13C4–D4, 360/270 for 13C5–D5, and 345/435 for 13C6–D6, respectively.

| <b>Table SI2 Amount (pg/sample) of PFASs in field blanks</b> |            |             |             |             |              |              |            |            |         |         |         |         |         |
|--------------------------------------------------------------|------------|-------------|-------------|-------------|--------------|--------------|------------|------------|---------|---------|---------|---------|---------|
|                                                              | 8:2<br>FTO | 4:2<br>FTOH | 6:2<br>FTOH | 8:2<br>FTOH | 10:2<br>FTOH | 12:2<br>FTOH | 6:2<br>FTA | 8:2<br>FTA | NMeFBSA | NMeFOSA | NEtFOSA | NMeFOSE | NetFOSE |
| <b>F1</b>                                                    | 55         | 187         | 85          | 58          | 133          | 23           | 23         | 17         | 26      | 65      | 321     | 45      | 56      |
| <b>F2</b>                                                    | 28         | 155         | 47          | 35          | 93           | 15           | 34         | 17         | 33      | 44      | 288     | 43      | 27      |
| <b>F3</b>                                                    | 79         | 143         | 93          | 44          | 77           | 37           | 53         | 27         | 28      | 37      | 293     | 34      | 48      |
| <b>F4</b>                                                    | 44         | 102         | 69          | 38          | 120          | 45           | 28         | 16         | 32      | 29      | 189     | 45      | 59      |
| <b>F5</b>                                                    | 27         | 89          | 84          | 45          | 135          | 22           | 15         | 5          | 43      | 34      | 210     | 26      | 54      |
| <b>F6</b>                                                    | 36         | 177         | 93          | 34          | 103          | 18           | 34         | 9          | 22      | 52      | 203     | 47      | 53      |
| <b>Ave</b>                                                   | 45         | 142         | 79          | 43          | 111          | 27           | 31         | 15         | 31      | 43      | 251     | 40      | 49      |
| <b>MDL</b>                                                   | 104        | 261         | 131         | 69          | 179          | 63           | 69         | 37         | 52      | 83      | 419     | 64      | 84      |

| <b>Table SI3 Amount (ng/sample) of cVMS in field blanks</b> |      |      |     |      |
|-------------------------------------------------------------|------|------|-----|------|
|                                                             | D3   | D4   | D5  | D6   |
| <b>F1</b>                                                   | 35   | 70   | 520 | 87   |
| <b>F2</b>                                                   | 29.9 | 39.7 | 437 | 55.8 |
| <b>F3</b>                                                   | 38.4 | 45.6 | 763 | 47.9 |
| <b>F4</b>                                                   | 27.9 | 33.8 | 553 | 58.6 |
| <b>F5</b>                                                   | 30.7 | 65.4 | 327 | 57.2 |
| <b>F6</b>                                                   | 45.5 | 88.7 | 378 | 47.7 |
| <b>Ave</b>                                                  | 34.5 | 57.2 | 380 | 59.0 |
| <b>MDL</b>                                                  | 52.5 | 115  | 681 | 98.6 |

| <b>Table S4 Air concentrations of FTO, FTOHs, FBSA, FOSAs, FBSE and FOSEs (pg m<sup>-3</sup>).</b> |                |                 |                 |                 |                  |                  |                |                |                |                |                |                |
|----------------------------------------------------------------------------------------------------|----------------|-----------------|-----------------|-----------------|------------------|------------------|----------------|----------------|----------------|----------------|----------------|----------------|
| <b>Sampling sites</b>                                                                              | <b>8:2 FTO</b> | <b>4:2 FTOH</b> | <b>6:2 FTOH</b> | <b>8:2 FTOH</b> | <b>10:2 FTOH</b> | <b>12:2 FTOH</b> | <b>NMeFBSA</b> | <b>NMeFOSA</b> | <b>NEtFOSA</b> | <b>NMeFBSE</b> | <b>NMeFOSE</b> | <b>NEtFOSE</b> |
| Bomi                                                                                               | 1.93           | 67.5            | 6.15            | 61              | 6.75             | 3.11             | 3.655          | 5.11           | 4.26           | 1.77           | 0.57           | 0.185          |
| Rawu                                                                                               | 1.27           | 72              | 8.6             | 83.5            | 11.4             | 4.86             | 2.78           | 6.35           | 3.44           | 3.38           | 0.81           | 0.13           |
| Lunang                                                                                             | 1.56           | 59.5            | 5.75            | 88              | 7.85             | 2.72             | 2.445          | 4.27           | 2.34           | 1.09           | 0.42           | 0.08           |
| Qamdo                                                                                              | 2.28           | 53.5            | 4.66            | 40              | 4.77             | 1.68             | 1.61           | 3.84           | 1.77           | 0.83           | 0.24           | 0.11           |
| Chayu                                                                                              | 1.21           | 93.5            | 18.55           | 85.5            | 15.65            | 9.25             | 7.8            | 7.75           | 5.12           | 0.92           | 0.38           | 0.085          |
| Nam Co                                                                                             | 1.61           | 37.5            | 2.26            | 32.5            | 2.29             | 1.23             | 1.385          | 1.79           | 0.88           | 0.27           | 0.14           | 0.22           |
| GBJD                                                                                               | 0.99           | 51              | 5.8             | 66.5            | 7.45             | 3.16             | 1.79           | 1.36           | 1.62           | 0.48           | 0.42           | 0.18           |
| Lhasa                                                                                              | 1.04           | 43.5            | 16.85           | 71              | 29.1             | 22.2             | 3.495          | 2.94           | 0.94           | 1.43           | 0.89           | 0.13           |
| Lhaze                                                                                              | 1.33           | 35              | 4.39            | 54              | 5.2              | 2.17             | 0.655          | 1.99           | 0.39           | 0.32           | 0.46           | 0.13           |
| Xigaze                                                                                             | 0.83           | 44.5            | 3.275           | 51              | 3.81             | 1.88             | 1.445          | 1.11           | 0.26           | 0.21           | 0.38           | 0.075          |
| Mt. Everest                                                                                        | 0.44           | 39.5            | 4.2             | 34              | 7.165            | 2.9              | 0.49           | 0.89           | 0.36           | 0.11           | 0.32           | 0.16           |
| Saga                                                                                               | 0.34           | 47.5            | 3.44            | 51              | 4.29             | 2.11             | 0.615          | 1.92           | 1.39           | 0.19           | 0.17           | 0.19           |
| Golmud                                                                                             | 1.11           | 37.5            | 8.3             | 69.5            | 10.1             | 3.7              | 0.99           | 1.22           | 0.98           | 0.245          | 0.335          | 0.08           |
| Naqu                                                                                               | 0.88           | 22.5            | 2.67            | 38              | 3.16             | 2.17             | 0.62           | 1.38           | 0.235          | 0.61           | 0.19           | 0.11           |
| Gar                                                                                                | 0.18           | 17.5            | 2.435           | 42.5            | 2.585            | 0.61             | 0.66           | 1.90           | 0.445          | 0.365          | 0.19           | 0.17           |
| Muztagata                                                                                          | 1.12           | 38.5            | 4.475           | 30              | 4.13             | 1.59             | 1.61           | 3.82           | 0.365          | 0.34           | 0.31           | 0.095          |



**Table S5 Relationships between Log  $K_{OA}$  of individual VMSs and Log ( $K_{SIP-A}$ )**

| Relationships between temperature and octanol-air partition coefficient (Log $K_{OA}$ ) of individual VMSs |      |      | Relationships between Log $K_{OA}$ of individual VMSs and Log ( $K_{SIP-A}$ )* |
|------------------------------------------------------------------------------------------------------------|------|------|--------------------------------------------------------------------------------|
| Log ( $K_{OA}$ ) = $m / (T) + b$ *                                                                         |      |      | Log ( $K_{SIP-A}$ ) = -0.05 Log $K_{OA}$ +6.51                                 |
|                                                                                                            | m    | b    |                                                                                |
| D3                                                                                                         | 1958 | -2.7 |                                                                                |
| D4                                                                                                         | 2583 | -3.2 |                                                                                |
| D5                                                                                                         | 3056 | -3.4 |                                                                                |
| D6                                                                                                         | 3648 | -3.7 |                                                                                |

---

## Text S2. Sampling rates ( $R_s$ ) estimation using DCs

By measuring the losses of DCs in PUF disks during each sampling period, the relationship described in eq 1 could be used to calculate the site-specific air sampling rates ( $R_s$ , Moeckel et al., 2009).

$$R = \frac{-\ln\left(\frac{C_{DC}}{C_{DC-stable}}\right) \cdot K_{PAS-A} \cdot \rho_{PAS} \cdot V}{t} \quad (1)$$

$$K_{PAS-A} = 10^{0.6366 \log K_{OA} - 3.1774} \quad (2)$$

Where,  $C_{DC}$  and  $C_{DC-stable}$  are the concentrations of DC and DC-stable at the end of the deployment period, respectively (ng sample<sup>-1</sup>).  $K_{PAS-A}$  is the chemical's PAS-air partition coefficient with units of m<sup>3</sup> g<sup>-1</sup> and it can be calculated according to the regression (eq 2) given by Shoeib and Harner (2002),  $\rho_{PAS}$  is the PAS bulk density (21300 g m<sup>-3</sup>),  $V$  is the volume of the PAS (0.000207 m<sup>3</sup>), and  $t$  is the deployment period in days. PCB-188 (average recovery is 81%) was used as DC-stable for correcting the losses of DCs. Only DCs that have recoveries within the desired range of between 20% and 80% should be used to estimate uptake rates. In our study (see Table SI-7), two proper DCs were PCB-30 (55%) and PCB-54 (73%).

## References:

Moeckel, C., Harner, T., Nizzetto, L., Strandberg, B., Lindroth, A., Jones, K.C., 2009.

Use of depuration compounds in passive air samplers: Results from active sampling-supported field deployment, potential uses, and recommendations. Environ. Sci. Technol. 43, 3227-3232.

Shoeib, M., Harner, T., 2002. Characterization and comparison of three passive air samplers for persistent organic pollutants. Environ. Sci. Technol. 36, 4142-4151.

| <b>Table S6. Summary of the recoveries of DCs (%) and calculated <math>R_s</math> values for different sampling site</b> |        |        |         |         |                     |                   |
|--------------------------------------------------------------------------------------------------------------------------|--------|--------|---------|---------|---------------------|-------------------|
| Sampling site                                                                                                            | PCB-30 | PCB-54 | PCB-104 | PCB-188 | $R_s$ ( $m^3/day$ ) | $k_A$ ( $m/day$ ) |
| Bomi                                                                                                                     | 61     | 42     | 10      | 98      | 4.8                 | 125               |
| Rawu                                                                                                                     | 41     | 75     | 22      | 114     | 4.6                 | 120               |
| Lunang                                                                                                                   | 55     | 78     | 20      | 99      | 4.4                 | 114               |
| Qamdo                                                                                                                    | 50     | 85     | 21      | 107     | 3.9                 | 101               |
| Chayu                                                                                                                    | 56     | 76     | 14      | 99      | 4.3                 | 112               |
| Nam Co                                                                                                                   | 31     | 46     | 20      | 91      | 6.2                 | 161               |
| GBJD                                                                                                                     | 70     | 78     | 19      | 85      | 3.8                 | 99                |
| Lhasa                                                                                                                    | 40     | 68     | 8       | 80      | 4.5                 | 117               |
| Lhaze                                                                                                                    | 60     | 60     | 24      | 119     | 4.3                 | 112               |
| Xigaze                                                                                                                   | 60     | 70     | 16      | 88      | 4.2                 | 109               |
| Mt. Everest                                                                                                              | 28     | 32     | 7       | 93      | 6.1                 | 159               |
| Saga                                                                                                                     | 32     | 46     | 27      | 107     | 5.7                 | 148               |
| Golmud                                                                                                                   | 31     | 39     | 10      | 78      | 6.0                 | 156               |
| Gaerze                                                                                                                   | 15     | 28     | 7       | 93      | 6.8                 | 177               |
| Gar                                                                                                                      | 18     | 35     | 8       | 80      | 6.5                 | 169               |
| Muztagata                                                                                                                | 27     | 30     | 16      | 81      | 6.4                 | 166               |

---

|             | D3   | D4   | D5   | D6   |
|-------------|------|------|------|------|
| Bomi        | 6.30 | 6.21 | 6.14 | 6.05 |
| Rawu        | 6.28 | 6.19 | 6.12 | 6.02 |
| Lulang      | 6.29 | 6.21 | 6.13 | 6.04 |
| Qamdo       | 6.30 | 6.21 | 6.13 | 6.04 |
| Chayu       | 6.30 | 6.22 | 6.14 | 6.06 |
| NamCo       | 6.28 | 6.19 | 6.12 | 6.02 |
| GBJD        | 6.29 | 6.21 | 6.13 | 6.04 |
| Lhasa       | 6.30 | 6.21 | 6.14 | 6.05 |
| Lhaze       | 6.30 | 6.21 | 6.13 | 6.04 |
| Xigaze      | 6.29 | 6.21 | 6.13 | 6.04 |
| Mt. Everest | 6.29 | 6.20 | 6.13 | 6.04 |
| Saga        | 6.29 | 6.21 | 6.13 | 6.04 |
| Golmud      | 6.29 | 6.21 | 6.13 | 6.04 |
| Naqu        | 6.28 | 6.21 | 6.12 | 6.02 |
| Gar         | 6.29 | 6.21 | 6.12 | 6.03 |
| Muztagata   | 6.28 | 6.19 | 6.11 | 6.01 |

---

|             | <b>V<sub>air</sub> (m<sup>3</sup>)</b> |           |           |           | <b>Average</b> |
|-------------|----------------------------------------|-----------|-----------|-----------|----------------|
|             | <b>D3</b>                              | <b>D4</b> | <b>D5</b> | <b>D6</b> |                |
| Bomi        | 83                                     | 101       | 119       | 147       | 112            |
| Rawu        | 82                                     | 101       | 120       | 149       | 113            |
| Lulang      | 76                                     | 93        | 110       | 136       | 104            |
| Qamdo       | 67                                     | 82        | 97        | 119       | 91             |
| Chayu       | 73                                     | 89        | 105       | 129       | 99             |
| NamCo       | 110                                    | 135       | 161       | 200       | 152            |
| GBJD        | 66                                     | 80        | 96        | 118       | 90             |
| Lhasa       | 77                                     | 95        | 112       | 138       | 105            |
| Lhaze       | 74                                     | 91        | 108       | 133       | 101            |
| Xigaze      | 72                                     | 89        | 105       | 129       | 99             |
| Mt. Everest | 106                                    | 130       | 155       | 191       | 145            |
| Saga        | 98                                     | 120       | 142       | 175       | 134            |
| Golmud      | 104                                    | 127       | 151       | 186       | 142            |
| Naqu        | 120                                    | 148       | 176       | 218       | 166            |
| Gar         | 114                                    | 140       | 167       | 206       | 157            |
| Muztagata   | 115                                    | 141       | 169       | 211       | 159            |

---

| <b>Table S9 Air concentrations of D3, D4, D5 and D6 (ng m<sup>-3</sup>)</b> |           |           |           |           |
|-----------------------------------------------------------------------------|-----------|-----------|-----------|-----------|
| <b>Sampling sites</b>                                                       | <b>D3</b> | <b>D4</b> | <b>D5</b> | <b>D6</b> |
| Bomi                                                                        | 44.4      | 37.8      | 74.0      | 1.2       |
| Rawu                                                                        | 33.0      | 54.2      | 103.6     | 2.9       |
| Lunang                                                                      | 17.8      | 43.5      | 48.1      | 1.0       |
| Qamdo                                                                       | 43.1      | 53.5      | 145.6     | 1.3       |
| Chayu                                                                       | 60.9      | 96.6      | 79.8      | 2.3       |
| Nam Co                                                                      | 11.2      | 20.2      | 4.0       | 0.9       |
| GBJD                                                                        | 71.1      | 59.5      | 130.0     | 1.7       |
| Lhasa                                                                       | 44.8      | 54.6      | 464.6     | 1.3       |
| Lhaze                                                                       | 12.7      | 42.7      | 80.8      | 2.8       |
| Xigaze                                                                      | 42.3      | 34.3      | 36.9      | 0.4       |
| Mt. Everest                                                                 | 39.5      | 27.8      | 6.6       | 0.2       |
| Saga                                                                        | 8.2       | 15.8      | 11.7      | 1.3       |
| Golmud                                                                      | 26.8      | 48.6      | 208.1     | 2.8       |
| Naqu                                                                        | 4.8       | 11.2      | 5.1       | 1.6       |
| Gar                                                                         | 3.4       | 13.5      | 9.5       | 2.9       |
| Muztagata                                                                   | 2.3       | 6.1       | 9.1       | 0.9       |
| average                                                                     | 29.1      | 38.8      | 88.6      | 1.6       |

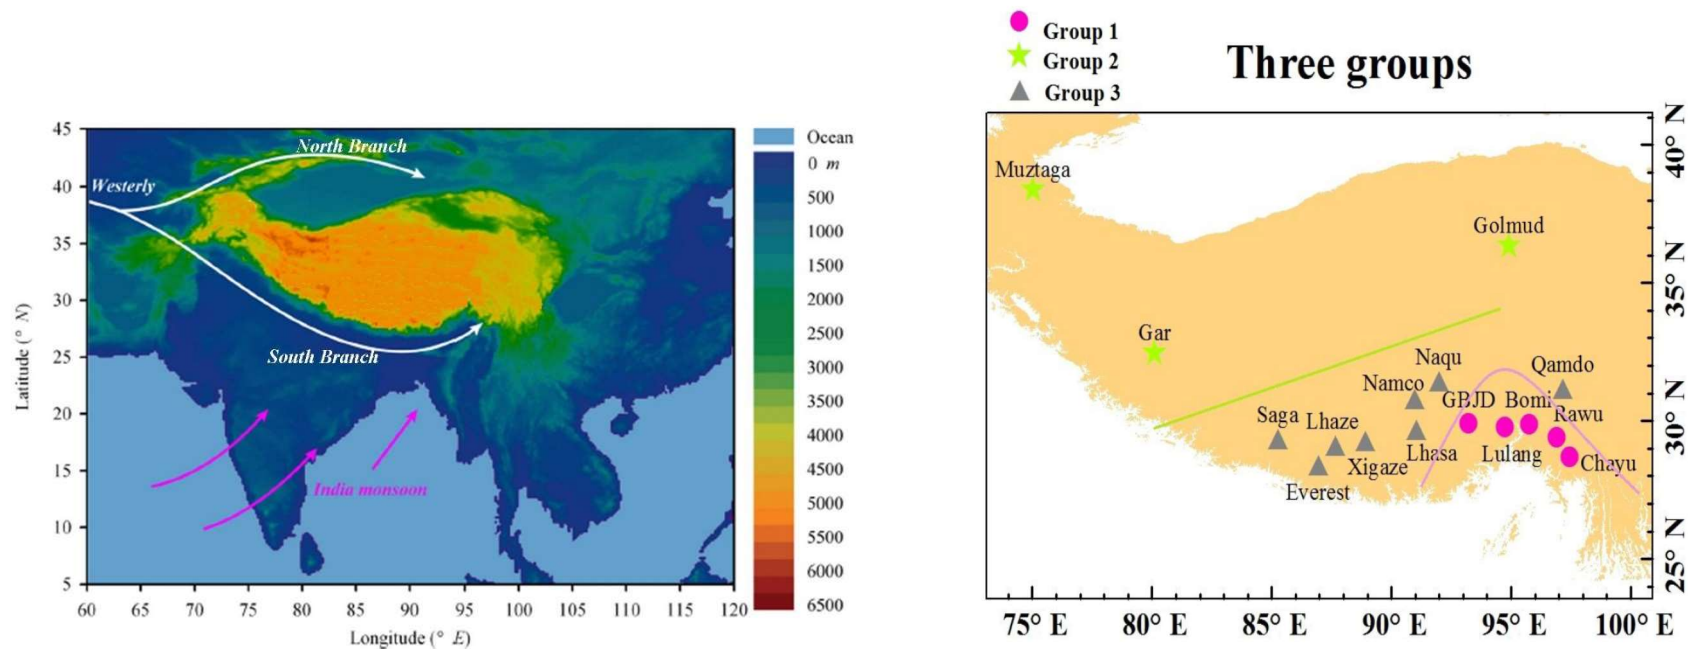

**Figure S2 Schematic of the air circulation pattern over the Tibetan Plateau, group1: Monsoon region; group 2: Westerly region; group 3: transition region**

Reference:

- Wang, X.; Ren, J.; Gong, P.; Wang, C.; Xue, Y.; Yao, T.; Lohmann, R. Spatial Distribution of the Persistent Organic Pollutants across the Tibetan Plateau and Its Linkage with the Climate Systems: Five Year Air Monitoring Study. *Atmospheric Chemistry and Physics* 2016, 16, 6901-6911.
- Wang, X.; Gong, P.; Yao, T., Jones, K.C. Passive air sampling of organochlorine pesticides, polychlorinated biphenyls, and polybrominated diphenyl ethers across the tibetan plateau. *Environ Sci Technol* 2010, 44, (8), 2988-93.

**Table S10. P-values (one-way ANOVA) for significant variation in levels of different class of chemicals in different sites**

| Sampling site | 8:2 FTO     | $\Sigma$ FTOH | $\Sigma$ FOSA | $\Sigma$ FOSE | $\Sigma$ cVMS |
|---------------|-------------|---------------|---------------|---------------|---------------|
| Bomi          | <b>0.02</b> | 0.36          | <b>0.02</b>   | 0.65          | 0.63          |
| Rawu          | <b>0.04</b> | <b>0.02</b>   | <b>0.01</b>   | 0.39          | <b>0.01</b>   |
| Lunang        | 0.27        | <b>0.02</b>   | <b>0.01</b>   | 0.63          | <b>0.02</b>   |
| Qamdo         | 0.35        | 0.77          | 0.79          | 0.84          | 0.74          |
| Chayu         | 0.29        | <b>0.03</b>   | <b>0.02</b>   | 0.74          | <b>0.01</b>   |
| Nam Co        | 0.37        | 0.45          | 0.86          | 0.38          | 0.56          |
| GBJD          | 0.88        | 0.39          | 0.74          | 0.48          | 0.48          |
| Lhasa         | 0.16        | 0.67          | 0.36          | 0.37          | <b>0.04</b>   |
| Lhaze         | 0.33        | 0.83          | 0.28          | 0.73          | 0.56          |
| Xigaze        | 0.28        | 0.77          | 0.65          | 0.36          | 0.38          |
| Mt. Everest   | 0.37        | 0.68          | 0.83          | 0.59          | 0.74          |
| Saga          | 0.62        | 0.93          | 0.67          | 0.82          | 0.58          |
| Golmud        | 0.44        | 0.87          | 0.37          | 0.39          | <b>0.03</b>   |
| Gaerze        | 0.56        | 0.68          | 0.55          | 0.58          | 0.52          |
| Gar           | 0.87        | <b>0.05</b>   | 0.47          | 0.44          | 0.46          |
| Muztagata     | 0.43        | <b>0.03</b>   | 0.74          | 0.76          | 0.48          |



| <b>Table S11 Ratios of 4:2/8:2 FTOH, 8:2/10:2 FTOH, 10:2/6:2FTOH in atmosphere of the TP</b> |                         |                          |                          |
|----------------------------------------------------------------------------------------------|-------------------------|--------------------------|--------------------------|
| <b>ratio</b>                                                                                 | <b>4:2/8:2<br/>FTOH</b> | <b>8:2/10:2<br/>FTOH</b> | <b>10:2/6:2<br/>FTOH</b> |
| <b>Monsoon region</b>                                                                        |                         |                          |                          |
| <b>Bomi</b>                                                                                  | 1.1                     | 9.03                     | 1.09                     |
| <b>Rawu</b>                                                                                  | 0.86                    | 7.32                     | 1.32                     |
| <b>Lunang</b>                                                                                | 0.67                    | 11.2                     | 1.36                     |
| <b>Chayu</b>                                                                                 | 1.09                    | 5.4                      | 0.84                     |
| <b>GBJD</b>                                                                                  | 0.76                    | 8.9                      | 1.28                     |
| <b>Average</b>                                                                               |                         | 8.3                      | 1.18                     |
| <b>Transition region</b>                                                                     |                         |                          |                          |
| <b>Qamdo</b>                                                                                 | 1.33                    | 8.38                     | 1.02                     |
| <b>Nam Co</b>                                                                                | 1.15                    | 14.1                     | 1.01                     |
| <b>Lhaze</b>                                                                                 | 0.64                    | 10.3                     | 1.18                     |
| <b>Xigaze</b>                                                                                | 0.87                    | 13.3                     | 1.16                     |
| <b>Mt. Everest</b>                                                                           | 1.16                    | 4.7                      | 1.70                     |
| <b>Saga</b>                                                                                  | 0.93                    | 11.8                     | 1.24                     |
| <b>Naqu</b>                                                                                  | 0.59                    | 12.0                     | 1.18                     |
| <b>Average</b>                                                                               |                         | 10.6                     | 1.21                     |
| <b>Westerly region</b>                                                                       |                         |                          |                          |
| <b>Muztagata</b>                                                                             | 1.28                    | 7.26                     | 0.92                     |
| <b>Gar</b>                                                                                   | 0.41                    | 10.4                     | 1.06                     |
| <b>Average</b>                                                                               |                         | 8.8                      | 0.99                     |
| <b>Cities</b>                                                                                |                         |                          |                          |
| <b>Lhasa</b>                                                                                 | 0.61                    | 2.43                     | 1.72                     |
| <b>Golmud</b>                                                                                | 0.53                    | 6.88                     | 1.21                     |

---

  

| <b>Table S12 Correlation (<i>r</i>) of individual VMS compounds<br/>among all the samples</b> |             |             |           |
|-----------------------------------------------------------------------------------------------|-------------|-------------|-----------|
|                                                                                               | <b>D4</b>   | <b>D5</b>   | <b>D6</b> |
| <b>D3</b>                                                                                     | <b>0.69</b> | <b>0.79</b> | 0.38      |
| <b>D4</b>                                                                                     |             | <b>0.72</b> | 0.25      |
| <b>D5</b>                                                                                     |             |             | 0.13      |
